# Supplementary material for: Graphene Oxide Composite for Selective Recognition, Capturing, Photothermal Killing of Bacteria over Mammalian Cells
Source: PubMed Central journal article supplement (PMC7285330; doi:10.3390/polym12051116), 2020-05-13
Supplement: polymers-12-01116-s001.pdf [file polymers-12-01116-s001.pdf]

## Supplementary Materials

# Graphene Oxide Composite for Selective Recognition, Capturing, Photothermal Killing of Bacteria Over Mammalian Cells

Gang Ma <sup>1</sup>, Junjie Qi <sup>1,\*</sup>, Qifan Cui <sup>2</sup>, Xueying Bao <sup>2</sup>, Dong Gao <sup>2</sup> and Chengfen Xing <sup>2,\*</sup>

<sup>1</sup> National-Local Joint Engineering Laboratory for Energy Conservation in Chemical Process Integration and Resources Utilization, School of Chemical Engineering and Technology, Hebei University of Technology, Tianjin 300131, P.R. China; magang0629@163.com (G.M.); qijunjie@hebut.edu.cn (J.Q.)

<sup>2</sup> Key Laboratory of Hebei Province for Molecular Biophysics, Institute of Biophysics, Hebei University of Technology, Tianjin 300401, P.R. China; cuiqifan1228@163.com (Q.C.); XueyingBao2017@163.com (X.B.); gaodong@iccas.ac.cn (D.G.); xingc@hebut.edu.cn (C.X.)

\* Correspondence: xingc@hebut.edu.cn; Tel/Fax: 86-22-60435642 (C.X.); qijunjie@hebut.edu.cn (J.Q.)

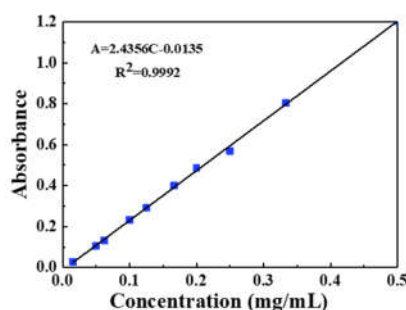

Figure S1. Standard curve of GO-PEG-NH<sub>2</sub> in PBS.

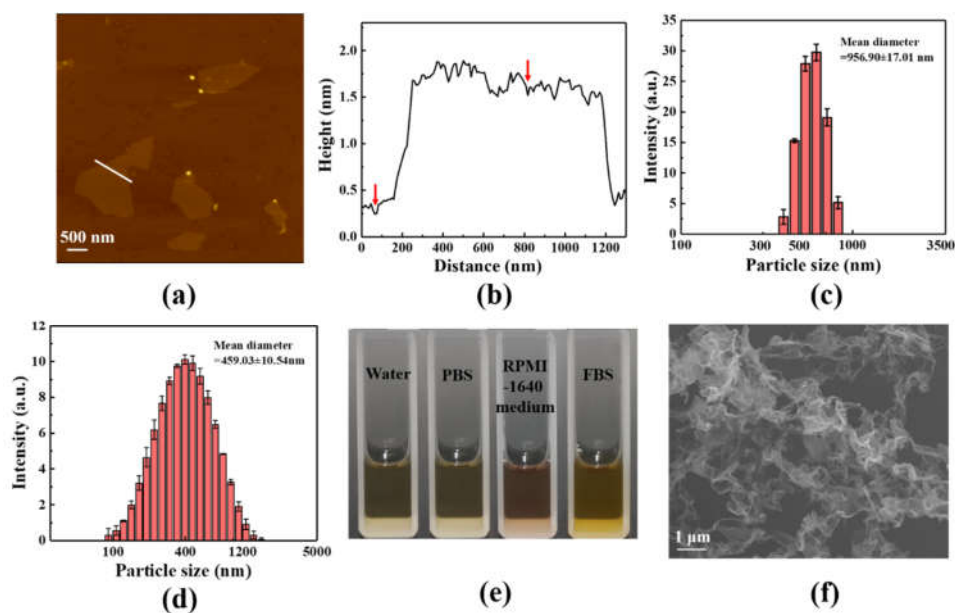

Figure S2. (a) AFM image of GO deposited on mica substrate. (b) The height profile of the AFM image. (c) Hydrodynamic diameter of GO measured by DLS. (d) Hydrodynamic diameter of GO-PEG-NH<sub>2</sub> measured by DLS. (e) Photograph of GO-PEG-NH<sub>2</sub> dispersed in different culture media for 24 h. (f) SEM image of GO-PEG-NH<sub>2</sub>.

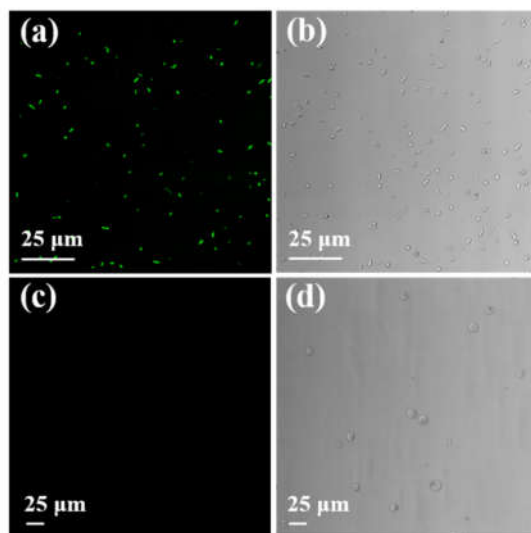

**Figure S3.** CLSM images of (a, b) *E. coli*, (c, d) CCRF-CEM.

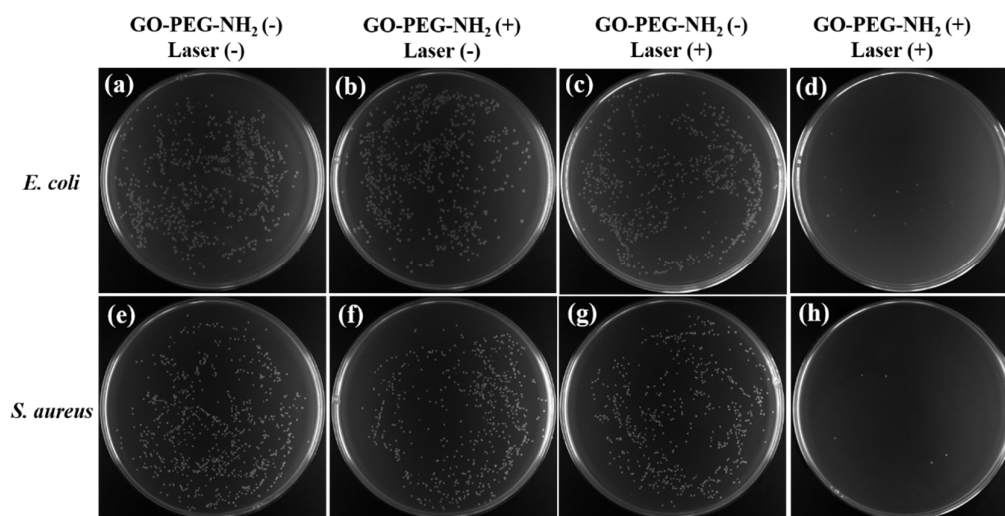

**Figure S4.** Gel imaging of *E. coli* and *S. aureus* colonies. (a, e) Plate photographs of the *E. coli* and *S. aureus* LB agar plate without GO-PEG-NH<sub>2</sub> under dark. (b, f) Plate photographs for *E. coli* and *S. aureus* LB agar plate supplemented with GO-PEG-NH<sub>2</sub> (50 μg/mL) under dark. (c, g) Plate photographs for *E. coli* and *S. aureus* LB agar plate upon 808 nm laser irradiation (1.5 W/cm<sup>2</sup> for 5 min). (d, h) Plate photographs for *E. coli* and *S. aureus* LB agar plate supplemented with GO-PEG-NH<sub>2</sub> upon 808 nm laser irradiation.

**Table S1.** Evaluation of *E. coli* colonies by plate counting method (The power density of the 808 nm laser is 1.5 W/cm<sup>2</sup>, the irradiation time is 5 min, and the concentration of GO-PEG-NH<sub>2</sub> is 50 μg/mL).

| Experimental Condition            | Number of Colonies |
|-----------------------------------|--------------------|
| Control/Non-Laser                 | 734 ± 1            |
| Control/Laser                     | 676 ± 23           |
| GO-PEG-NH <sub>2</sub> /Non-Laser | 611 ± 15           |
| GO-PEG-NH <sub>2</sub> /Laser     | 9 ± 7              |

**Table S2.** Evaluation of *S. aureus* colonies by plate counting method (The power density of the 808 nm laser is 1.5 W/cm<sup>2</sup>, the irradiation time is 5 min, and the concentration of GO-PEG-NH<sub>2</sub> is 50 μg/mL).

| Experimental Condition            | Number of Colonies |
|-----------------------------------|--------------------|
| Control/Non-Laser                 | 776 ± 31           |
| Control/Laser                     | 767 ± 34           |
| GO-PEG-NH <sub>2</sub> /Non-Laser | 714 ± 22           |
| GO-PEG-NH <sub>2</sub> /Laser     | 6 ± 5              |

**Table S3.** Evaluation of *S. aureus* and *E. coli* colonies by plate counting method (The power density of the 808 nm laser is 1.5 W/cm<sup>2</sup>, and the irradiation time is 5 min).

| Concentration (µg/mL) | Number of Colonies ( <i>E. coli</i> ) | Number of Colonies ( <i>S. aureus</i> ) |
|-----------------------|---------------------------------------|-----------------------------------------|
| Control               | 734 ± 1                               | 776 ± 31                                |
| 10                    | 258 ± 46                              | 279 ± 47                                |
| 30                    | 69 ± 30                               | 66 ± 35                                 |
| 50                    | 9 ± 7                                 | 6 ± 5                                   |
| 70                    | 3 ± 2                                 | 1 ± 1                                   |
